# Supplementary material for: Prenatal Detection of Aneuploidy and Imbalanced Chromosomal Arrangements by Massively Parallel Sequencing
Source: PLoS One. 2012 Feb 28;7(2):e27835. doi: 10.1371/journal.pone.0027835 (PMC3289612; doi:10.1371/journal.pone.0027835)
Supplement: Table S2 — The z-scores of each chromosome (except chr Y) for 62 AF samples. (XLS) [file pone.0027835.s002.xls]

## Sheet: Sheet1
			1	2	3	4	5	6	7	8	9	10	11	12	13	14	15	16	17	18	19	20	21	22	23	24	25	26	27	28	29	30	31	32	33	34	35	36	37	38	39	40	41	42	43	44	45	46	47
	mean	s.d.	92H13	08H9	09H10	10H11	11H12	12H14	13H15	15H18	17HCGY	19H2	21H4	25H9	27H1	31H6	32H7	33H8	34H9	40H6	42H8	43H9	44H10	45H11	46H12	47H13	48H1	54H7	56H9	57H10	60H14	62H16	61HWMH	72HT21	74H3	81HWMH	02H2	06H7	82HCXP	04H4	05H6	63H17	65H4	66H9	67H10	68H11	69H12	70H13	71H14
chr1	7.93073	0.115967	-1.65396	-0.373393	-0.692581	0.294927	-0.0837834	0.0359719	-1.06902	-0.554292	-0.725565	-1.54526	-2.15487	-0.0895191	-0.334404	1.36459	1.93076	0.25875	1.27941	1.20771	0.189074	-0.458326	0.480622	1.55103	0.871803	1.24572	-0.454228	-0.494007	-1.09921	0.530958	-0.170333	0.711434	-1.56629	0.348591	-0.274032	2.46637	-0.537099	-0.732879	-0.0278444	0.393845	0.202818	0.505547	1.1171	-1.41964	-0.329172	-0.618715	-1.6211	-0.487133	-0.503554
chr2	9.04082	0.145897	-0.342228	-0.537799	1.73922	0.326196	-0.947278	0.552662	-0.962755	1.34362	0.949583	1.41585	-0.141058	0.744788	-1.4622	-0.600938	-0.246092	0.63471	-0.41847	-2.13057	1.1223	-1.84736	0.0690406	-0.00858713	-0.267321	-0.439337	0.980444	0.850235	-0.380843	-1.52453	0.534198	0.994503	-0.842588	0.799455	-1.32623	-1.0626	-0.771291	-0.605259	-0.340647	0.143041	-1.20532	0.0753842	-0.209287	-0.489962	-1.29661	0.763717	-0.743776	-1.78724	-1.47104
chr3	7.33947	0.163392	-0.657265	-0.98705	1.23896	0.875376	-0.500639	0.458696	-0.421766	1.70653	0.194387	1.70025	0.116702	0.989915	-0.821674	-0.307903	-0.916337	0.138791	-0.751945	-2.12277	0.97582	-1.71441	0.123406	-0.790214	-0.0898154	-0.860387	0.995151	0.993168	-0.0264134	-1.30348	1.43259	0.332328	-0.486681	0.498317	-1.78081	-0.924019	-0.345785	-0.39447	0.255515	0.18192	-1.37345	1.10573	-1.0262	0.164293	-1.3306	1.36782	-0.874046	-1.89745	-0.879013
chr4	6.89803	0.30007	-0.254087	-0.560538	1.6088	0.0313242	-0.316904	0.303176	0.187521	1.5157	0.673863	1.46316	0.911816	0.931628	-0.566425	-0.945663	-1.46244	-0.431986	-0.987007	-2.37349	0.917533	-1.48532	-0.166254	0.0229821	-0.267728	-0.779209	1.07623	0.986466	0.1214	-1.19466	1.29319	-0.253089	0.237777	0.987714	-1.04501	-1.54835	-0.469223	-0.176854	0.151444	0.0655357	-1.29636	0.727052	-0.389522	0.54787	-0.631799	1.3243	-0.370126	-1.27051	-1.18052
chr5	6.62131	0.171785	-0.691114	-0.877485	1.4841	0.377336	-1.06696	0.161843	-0.554109	1.47418	0.947833	1.45135	0.369497	1.19169	-0.539841	-0.521887	-0.326992	0.0340545	-0.747491	-2.69196	0.956476	-1.18402	0.461615	-0.429454	-0.293475	-0.617092	1.00139	0.896617	-0.0508723	-1.50265	1.21236	0.0750474	-0.725613	-0.121613	-1.51423	-1.37004	-0.522237	-0.501311	-0.137304	0.0314187	-1.28948	0.294732	-0.4801	0.127494	-0.648775	1.11578	-0.591535	-0.81039	-1.3056
chr6	6.39965	0.148276	-0.944464	-0.949732	1.75324	0.552849	-0.771793	0.618743	-0.534306	1.24769	0.737705	1.34921	0.274481	1.39563	-0.636551	-0.560365	-0.891913	0.126601	-0.709268	-2.46334	0.898947	-1.28015	0.310244	-0.239138	-0.207743	-0.340099	1.29718	1.03419	-0.118909	-1.56733	0.723344	-0.104956	-0.572113	0.174152	-0.929153	-1.52092	-0.509187	-0.180572	-0.281456	0.169305	-1.33965	0.308502	0.149503	0.291232	-0.785199	1.22327	-0.789395	-1.29835	-1.01974
chr7	5.46138	0.0819567	-1.06277	-1.32112	0.459188	0.394792	-1.09472	0.47068	-1.27693	0.838779	0.899359	1.36516	-0.493739	0.653522	-1.20032	0.00724145	0.819913	0.718417	0.523112	-2.36648	0.896609	-1.75327	0.967129	0.129339	0.927034	0.222078	0.746707	0.42611	-0.402031	-1.60992	0.947838	0.168291	-0.582058	-0.311905	-1.88861	-1.16611	-0.674154	0.0726884	-0.291845	0.551623	-1.74949	0.251623	0.504042	-0.927218	-0.573168	0.953886	-0.566887	-1.4945	-1.23461
chr8	5.29533	0.0912159	-0.888267	-0.88537	1.88807	0.394488	-0.67002	0.309358	-0.139272	1.40554	0.867684	1.15387	-0.438723	0.70974	-1.89351	-0.636094	-0.629223	-0.172093	-0.836808	-1.59555	0.525098	-0.955456	0.881001	0.49632	0.539945	0.168519	1.20225	0.97712	-0.302119	-2.2613	0.767308	0.0174969	-0.617925	0.49204	-2.12207	-2.19246	-0.862799	-0.405665	-1.50136	0.790149	-1.4295	0.585828	-0.726542	-0.555867	-1.35938	1.49292	-1.04744	-1.58241	-1.71889
chr9	4.00094	0.0572472	-1.05226	-0.403704	-1.03543	0.673993	-0.480425	0.601451	-0.574106	-0.428266	-0.225082	-0.722884	-1.38423	0.0387697	-1.51561	1.02134	2.6688	-0.242425	1.34276	0.757625	-0.410976	-0.68594	1.12402	0.193185	1.10579	1.17588	-0.185876	0.413972	-1.90041	0.468211	-0.900191	0.562028	-1.65859	0.699981	0.747204	-2.10654	-0.0383719	-0.91628	-0.545783	0.382071	0.281609	-0.944412	0.848134	-2.42856	0.340416	-0.527725	-0.729457	-0.267538	-1.66744
chr10	4.81924	0.0693516	-0.325499	-0.933811	-1.04283	0.210134	-1.1565	0.208349	-0.67588	-1.40891	0.348564	-0.62424	-2.18878	-0.391652	0.398895	1.47542	1.88035	0.0357109	1.47141	1.43918	-0.431324	1.33886	0.0430827	0.932766	1.35111	0.523604	-0.817823	-0.479151	-1.0816	0.0120352	-0.544742	0.433254	-0.643643	-0.0508739	-0.384907	0.131195	-0.174498	-0.849324	-0.997116	0.726901	-0.42884	0.0224333	0.969898	-1.17714	-0.175989	-0.606859	-0.756689	0.086982	-0.00687803
chr11	4.64362	0.0780559	-0.192404	-0.455331	-0.518354	0.0163822	-0.257021	0.773828	-0.75329	-1.25671	-0.723876	-1.0197	-1.80811	-0.589955	-0.349779	0.865145	2.24556	0.384618	1.61986	1.87079	0.126612	-0.649249	0.736269	1.03837	0.359855	1.24736	-0.715125	-0.19137	-1.71094	0.583815	-0.84855	0.171296	-2.05639	-0.748817	-0.512525	1.07148	-0.14705	-0.763572	-1.099	0.725995	0.351224	0.0120022	0.626547	-2.28438	-0.590962	-1.00197	-0.253915	-0.00191422	0.247265
chr12	4.66907	0.0647597	-1.20029	-1.58876	1.16034	0.463733	-0.657709	0.404629	-0.931688	1.14043	0.808404	1.12341	-0.0634337	1.22035	-1.72744	0.440087	-1.48113	1.00727	0.658797	-1.74787	-0.0770325	-0.861441	0.307016	0.128002	0.204352	0.5316	0.901963	1.32365	-0.164297	-1.86297	0.397939	0.14208	-1.12079	-0.489267	-1.85393	-2.14004	-0.615736	-0.561587	-0.137434	0.66759	-0.921228	0.925946	0.604084	0.292989	0.258762	0.914411	-1.15663	-0.757342	-0.964643
chr13	3.73253	0.134654	-0.318586	-0.668775	1.37182	0.0744202	-0.38818	0.280183	-0.186362	1.57302	1.09313	1.31274	0.714408	1.00745	-0.39679	-1.09795	-1.05737	-0.137855	-0.701687	-2.43626	0.670771	-1.53988	0.00937797	-0.6383	-0.0930872	-1.10022	0.973234	0.895024	0.398052	-1.21742	1.61785	-0.0127641	-0.163455	0.543528	-1.46034	-2.57281	-0.514573	-0.10189	0.513899	-0.393306	-1.14099	1.03861	-0.121879	0.774382	-0.557762	1.68307	-0.764297	-1.10465	-1.32871
chr14	3.25681	0.0398485	-0.827902	-0.848233	0.92209	0.561189	-0.570342	0.272762	-0.836682	-0.0690869	-0.576257	1.62661	-1.07955	1.19813	-0.617344	0.042035	-1.29058	1.20321	1.17103	-1.24642	0.701429	-1.68663	0.637533	0.420369	0.12069	0.298195	-0.260587	1.46104	-2.00248	-0.815913	1.38959	0.702088	-1.30104	-1.54833	-1.18399	-1.39992	-0.267768	-1.5741	-0.682539	0.134174	-1.14056	1.06159	0.465296	-1.04255	-1.70961	0.402388	-1.40081	0.144652	-1.08794
chr15	2.85782	0.0553827	-0.521283	0.344382	-1.73867	0.482235	-0.609678	1.01895	-0.890375	-1.02523	0.15623	-1.1884	-2.12552	-0.453047	0.026282	1.53328	1.23375	0.269609	1.24815	0.969328	-0.527804	0.199554	-0.700727	0.656757	0.601755	2.02844	-0.562128	-0.258001	-1.44732	0.994723	-0.22631	0.511061	-1.96553	-1.04794	-0.420857	0.864898	0.465346	0.0438295	1.00192	0.273364	-0.224701	-0.0953107	0.73969	-1.30276	-1.1509	-1.09668	-1.00313	0.336677	-0.169051
chr16	2.59484	0.146531	-0.495905	-0.117214	-1.32569	0.00112189	-0.403314	-0.203545	-0.642237	-1.22099	-0.340795	-1.3792	-1.40883	-0.983472	-0.109363	1.39868	1.8122	0.563455	1.31157	2.07563	-0.692613	1.20019	0.551848	1.03103	0.462586	1.17214	-0.816239	-0.608904	-0.944411	0.710025	-0.939023	0.341276	-0.962875	-0.739273	0.305382	0.778732	-0.0959267	-0.33557	-0.404847	0.440935	0.89296	-0.266886	0.976449	-1.15844	0.0616841	-1.06909	-0.234263	0.751389	0.523975
chr17	2.6443	0.175384	-0.150107	0.16468	-1.50611	0.0348792	-0.336297	-0.243407	-0.368983	-1.38051	-0.38747	-1.45729	-1.45035	-0.930118	0.358301	1.24586	1.79793	0.70184	1.29771	1.8438	-0.801095	1.18682	0.147454	0.649255	0.486474	1.27665	-0.958999	-0.882666	-0.833498	0.978894	-0.914845	0.431181	-0.913374	-0.766268	0.393538	0.846001	0.278305	-0.235583	-0.56131	0.345794	0.695555	-0.0583588	1.07088	-1.27203	0.105913	-1.17707	0.0511142	0.767012	1.1825
chr18	2.97803	0.0598664	-0.977974	-1.13692	1.21668	0.0406467	-0.175286	0.811744	-0.755317	1.69895	1.18486	1.84691	0.00271573	0.397455	-1.00543	0.299469	-1.65597	0.386811	-0.513857	-1.42179	0.56447	-1.26143	0.394618	-0.645283	-0.0269177	-0.225024	0.97181	1.03071	0.0365408	-1.33519	1.45182	-1.19982	-0.11094	0.505556	-2.57428	-3.14771	23.8528	26.1407	24.4378	-0.603802	-1.22725	0.23857	-0.0977629	-0.274595	-1.94175	1.69971	-0.662385	-1.27793	-1.65173
chr19	1.42425	0.18687	-0.214966	-0.0129435	-1.62766	0.0370915	-0.23707	0.0540682	-0.278512	-1.51892	-0.376179	-1.52401	-1.14077	-0.844579	0.324954	1.39484	1.31209	0.615015	1.40847	2.02068	-0.543878	1.19206	0.29467	0.412753	0.676682	1.29771	-1.0518	-1.04324	-0.892204	0.958676	-1.01606	0.323024	-0.586266	-0.663759	0.660452	0.33996	0.191226	-0.141228	-0.607895	0.297657	0.814012	-0.382675	1.0457	-0.934832	0.393506	-1.17677	0.161168	0.88186	1.0629
chr20	2.1172	0.0985564	0.0167355	0.200983	-1.53188	0.315058	-0.191617	-0.0511525	-0.793635	-1.1882	-0.538922	-1.53613	-1.44045	-0.853225	-0.370835	1.47432	1.55875	0.517874	1.28202	2.29902	-0.495045	0.991563	-0.176387	1.41141	0.598429	0.69828	-0.940964	-0.463994	-0.816978	0.514599	-0.873818	0.384199	-0.907001	-0.697272	0.21092	0.210199	-0.00218773	-0.0175028	-0.658553	0.686225	0.408723	0.00818399	0.622703	-1.56344	-0.279193	-1.16862	0.527717	0.712997	0.875375
chr21	1.28586	0.0205784	-0.814975	-1.2869	0.442335	0.490156	-1.00156	-0.786159	-1.17667	-0.345799	-0.543494	1.14038	-1.29896	2.02228	-1.16178	0.488531	2.56428	1.01808	0.374624	-1.13068	0.356034	-0.372835	0.641292	1.07124	0.0662942	-0.747494	0.555141	0.649736	-0.712867	-0.110471	-1.03515	0.645418	27.2032	31.5069	29.8201	21.8308	-0.30517	-1.26206	-0.728793	0.599498	-0.440137	0.302085	0.836363	-0.339067	-0.479606	0.502223	-0.398834	-1.87497	0.22995
chr22	1.08728	0.120408	0.162567	-0.00260278	-1.38851	0.010126	-0.205998	-0.117062	-0.375671	-1.43631	-0.308316	-1.474	-1.31151	-1.20688	0.350024	1.12801	1.26651	0.553198	1.56221	2.017	-0.520676	1.15998	0.081991	0.499088	0.633514	1.57385	-1.03102	-1.03207	-0.843991	0.760365	-1.03636	0.532549	-0.604231	-0.743171	0.616444	0.746678	-0.0257584	-0.220073	-0.466921	0.268996	0.988285	-0.23164	0.77202	-1.14776	0.351717	-1.09478	-0.0119501	1.10736	0.706044
chrX_female	4.17812	0.064071	0.718258	0.752445	/	/	0.134013	/	-0.0229552	/	/	/	1.7893	/	-0.293206	/	/	/	/	-1.57317	/	-0.802201	/	/	/	/	/	/	0.594007	-0.702483	/	/	-1.23521	/	-1.31382	-2.12438	/	/	/	/	-0.704697	/	/	1.54705	-0.146702	/	0.398877	0.18908	-1.03199
chrX_male	2.13877	0.0545815	/	/	0.440099	-0.20383	/	0.277646	/	0.568959	0.2846	1.43031	/	0.487985	/	-0.882426	-1.6934	-0.978322	-1.78758	/	-0.42065	/	-0.0608971	-0.338857	-0.304343	-0.244877	2.54106	-0.178881	/	/	-0.0589303	1.12234	/	0.650275	/	/	-0.966539	-0.678285	-1.96307	-0.250961	/	-1.11908	-0.615333	/	/	0.233226	/	/	/
[truncated: 15 more columns]
