# Supplementary material for: Prenatal Detection of Aneuploidy and Imbalanced Chromosomal Arrangements by Massively Parallel Sequencing
Source: PLoS One. 2012 Feb 28;7(2):e27835. doi: 10.1371/journal.pone.0027835 (PMC3289612; doi:10.1371/journal.pone.0027835)
Supplement: Table S3 — Outcome and clinical data of CUHK cases. (XLS) [file pone.0027835.s003.xls]

## Sheet: Sheet1
Supporting Information(SI) Table S3, Outcome and clinical data of CUHK_cases
Array No.	Clinical details	Outcome
A10021383	de novo fetal 46XY, 2q+	Termination of Pregnancy (TOP)
A10021390	Positive Down screening risk: 1/9; Familial Chr. Defect: Mat 46,XX,t(5.18)(p13.1;q12.3); TR, VSD, Prev. child; Partial trisomy 5	Termination of Pregnancy (TOP)
A10071659	Holoprosencephaly, Migration disorder? TOP, Autopsy	Termination of Pregnancy (TOP)
A10071710	Interruption aortic arch (type B susp), VSD, Hyperterolism, Exophthalmos, micrognathia, IUGR	Termination of Pregnancy (TOP)
A11091844	USG: renal cyst	Live birth; mild development delay
